# Supplementary material for: Too Mild, too Harsh, or Just About Right?
Source: Atypon-hosted journal article supplement (doi:10.1027/1614-0001/a000405), 2023-07-20
Supplement: 1614-0001_a000405_esm1.pdf [file 1614-0001_a000405_esm1.pdf]

Electronic Supplementary Material 1 for Čepulić, D.-B. (2023). Too mild, too harsh, or just about right? The relationship between personality and perception of COVID-19 measures. *Journal of Individual Differences*. <https://doi.org/10.1027/1614-0001/a000405>

### BFI-S reliability

The reliability of the personality scales was estimated via the omega coefficient (reliability) function from the semTools package; Jorgensen et al., 2021). Table E1 shows that reliabilities of neuroticism, extraversion and openness are somewhat higher than reliabilities of conscientiousness and agreeableness.

**Table E1**

*Omega reliabilities for BFI-S personality scales in different countries*

| Country                | N           | E           | O           | C           | A           |
|------------------------|-------------|-------------|-------------|-------------|-------------|
| Bosnia and Herzegovina | .648        | .764        | .604        | .638        | .569        |
| Bulgaria               | .663        | .747        | .620        | .545        | .531        |
| Croatia                | .713        | .784        | .651        | .642        | .588        |
| Czech Republic         | .744        | .823        | .623        | .526        | .552        |
| Finland                | .724        | .836        | .678        | .610        | .601        |
| France                 | .776        | .849        | .664        | .569        | .573        |
| Germany                | .761        | .796        | .669        | .602        | .545        |
| Japan                  | .787        | .724        | .733        | .509        | .592        |
| Mexico                 | .710        | .786        | .651        | .581        | .538        |
| Poland                 | .649        | .743        | .643        | .571        | .551        |
| Sweden                 | .802        | .807        | .659        | .601        | .589        |
| Switzerland            | .750        | .806        | .600        | .575        | .554        |
| Turkey                 | .684        | .786        | .761        | .541        | .555        |
| United Kingdom         | .720        | .778        | .646        | .567        | .552        |
| United States          | .770*       | .849        | .667        | .558        | .585        |
| <b>Total</b>           | <b>.729</b> | <b>.807</b> | <b>.701</b> | <b>.628</b> | <b>.601</b> |

*Note.* N = neuroticism, E = extraversion, O = openness, C = conscientiousness, A = agreeableness. All countries from the original COVIDiSTRESS dataset with  $\omega < .50$  were excluded from further analyses (see Data preparation section in the main article)

\* For the US, a negative residual variance of item 2 was estimated in the CFA model using the DWLS estimator for ordinal variables. Thus, omega reliability for Neuroticism scale was additionally estimated via the MLR estimator - it was .765

## Software

The data were analyzed in R (R Core Team, 2021). It was examined, cleaned, and visualized with *tidyverse* (Wickham et al., 2019) and *janitor* (Firke, 2021) packages; the CFA models were estimated, reliabilities were estimated and measurement invariance was tested with *lavaan* (Rosseel, 2012) and *semTools* (Jorgensen et al., 2021) packages, and package *sirt* (Robitzsch, 2021) was used to test the approximate measurement invariance via alignment approach. Linear mixed models analyses were done with *lme4* (Bates et al., 2015), *lmerTest* (Kuznetsova et al., 2017) and *emmeans* (Lenth, 2021) packages.

## Measurement invariance testing

### *Multigroup CFA*

To compare personality differences between people with distinct perceptions of strictness of COVID-19 measures (PSM) across countries, measurement invariance was evaluated. This was first done via the multigroup CFA with DWLS estimator and by treating scale items as ordinal. The criteria for establishing invariance were adopted from Rutkowski and Svetina (Rutkowski & Svetina, 2017;  $\Delta CFI \geq -.004$  and  $\Delta RMSEA \leq .05$  for metric invariance, and  $\Delta CFI \geq -.004$  and  $\Delta RMSEA \leq .01$  for scalar, i.e. threshold invariance).

**Table E2***Testing measurement invariance of personality dimensions with robust/scaled fit indices*

|                                          | Model      | $\chi^2$ scaled (df scaled) | <i>p</i> | CFI   | RMSEA | $\Delta$ CFI | $\Delta$ RMSEA |
|------------------------------------------|------------|-----------------------------|----------|-------|-------|--------------|----------------|
| <b>Neuroticism</b>                       |            |                             |          |       |       |              |                |
|                                          | Configural | -                           | -        | 1.000 | .000  | -            | -              |
|                                          | Metric     | 1731.558 (28)               | < .001   | .983  | .121  | -.017        | .121           |
|                                          | Scalar     | 18567.799 (182)             | < .001   | .813  | .156  | -.170        | .035           |
| <b>Extraversion</b>                      |            |                             |          |       |       |              |                |
|                                          | Configural | -                           | -        | 1.000 | .000  | -            | -              |
|                                          | Metric     | 2243.846 (28)               | < .001   | .990  | .138  | -.010        | .138           |
|                                          | Scalar     | 21619.261 (182)             | < .001   | .899  | .169  | -.091        | .031           |
| <b>Openness</b>                          |            |                             |          |       |       |              |                |
|                                          | Configural | -                           | -        | 1.000 | .000  | -            | -              |
|                                          | Metric     | 302.453 (28)                | < .001   | .996  | .049  | -.004        | .049           |
|                                          | Scalar     | 7284.551 (182)              | < .001   | .885  | .097  | -.111        | .048           |
| <b>Agreeableness</b>                     |            |                             |          |       |       |              |                |
|                                          | Configural | -                           | -        | 1.000 | .000  | -            | -              |
|                                          | Metric     | 1035.838 (28)               | < .001   | .972  | .093  | -.028        | .093           |
|                                          | Scalar     | 6701.283 (182)              | < .001   | .816  | .093  | -.156        | .000           |
| <b>Conscientiousness (MLR estimator)</b> |            |                             |          |       |       |              |                |
|                                          | Configural | -                           | -        | 1.000 | .000  | -            | -              |
|                                          | Metric     | 360.868 (28)                | < .001   | .976  | .054  | -.024        | .054           |
|                                          | Scalar     | 4189.228 (56*)              | < .001   | .702  | .133  | -.274        | .079           |

*Note.* \* these degrees of freedom are different from those in other scalar models because models for conscientiousness were estimated with MLR instead of DWLS estimator (also, indicators were treated as interval, and not ordinal variables)

Table E2 shows the results of measurement invariance tests for different personality dimensions.

In the case of neuroticism, the configural model estimated a negative residual variance of one item in the United States sample (-0.075). However, because the estimated value was close to zero, and there were no negative residual variances when estimating the model with the MLR estimator, the configural model obtained using the DWLS estimator was accepted. Also, because some categories of an item in the subsample of Bosnia and Herzegovina for the conscientiousness dimension were empty, measurement invariance was tested using the MLR estimator. When looking simultaneously at  $\Delta$ CFI and  $\Delta$ RMSEA (Table E2), metric invariance

was observed only for openness, and scalar invariance was not observed for any personality scale<sup>1</sup>.

*Approximate invariance test*

Because multigroup CFA may be too sensitive to small deviations when measurement invariance is evaluated across large number of groups, the alignment method was proposed for evaluation whether approximate (instead of exact) invariance holds (Asparouhov & Muthén, 2014; Byrne & van de Vijver, 2017; Fischer & Karl, 2019).  $R^2$  values indicate how similar the aligned parameters (item loadings and intercepts) are across groups – estimates close to 1 suggest high invariance (Asparouhov & Muthén, 2014; Fischer & Karl, 2019; Robitzsch, 2021). Also, Muthén and Asparouhov (2014) suggest a cut-off of 25% non-invariance to regard the results of the alignment to be credible. The tolerance for declaring an aligned item parameter for a certain group non-invariant was 0.2 for loadings, and 0.4 for intercepts, as suggested by Robitzsch (2021). For those who are interested, Fischer and Karl (2019) offer a helpful tutorial for testing approximate measurement invariance in R.

---

<sup>1</sup> Metric invariance for conscientiousness was also not achieved when using more liberal criteria by Rutkowski and Svetina (2014)

**Table E3***Approximate invariance test for personality dimensions via the alignment method*

|                   | Estimator | $R^2$    |            | % noninvariant items |            |
|-------------------|-----------|----------|------------|----------------------|------------|
|                   |           | Loadings | Intercepts | Loadings             | Intercepts |
| Neuroticism       | DWLS      | .979     | -          | 6.667                | -          |
|                   | MLR       | .968     | .996       | 13.333               | 8.889      |
| Extraversion      | DWLS      | .989     | -          | 4.444                | -          |
|                   | MLR       | .979     | .996       | 13.333               | 24.444     |
| Openness          | DWLS      | .995     | -          | 0                    | -          |
|                   | MLR       | .989     | .998       | 0                    | 4.444      |
| Agreeableness     | DWLS      | .987     | -          | 4.444                | -          |
|                   | MLR       | .981     | .998       | 2.222                | 4.444      |
| Conscientiousness | DWLS      | .968     | -          | 8.889                | -          |
|                   | MLR       | .965     | .998       | 6.667                | 4.444      |

Alignment was performed for item parameters using both DWLS and MLR estimators because package *sirt* (Robitzsch, 2021) does not align thresholds estimated by DWLS. However, the conclusions regarding loadings for both estimators are similar. All  $R^2$  values in Table E3 are greater than .96, and the percentages of non-invariant items are below 25% for both item loadings and intercepts of all personality dimensions. This indicated adequate absorption of non-invariance via alignment for all personality dimensions across 15 countries. Next, aligned personality scores for each participant were estimated with the `factor.scores()` function from the package *psych* (Revelle, 2022) using the country-specific aligned lambdas and “components” method of factor score estimation (analogous to the aligned factor score estimation by Han, 2021). The aligned personality scores were then rescaled to range from 1 to 6 (to reflect the original scale) and used in the following linear mixed model analyses.

The correlation between the composite scores and aligned personality factor scores ranged between .91 and .96.

### **Linear mixed models**

The initial linear mixed models estimated correlated random intercepts and random slopes for the PSM and health-risk dummy predictors, and their interaction, as these were the associations of interest. However, overparameterization may result in singular variance-covariance matrices of random effects (Bates et al., 2018). If the initial model fit was singular, the random effect structure was reduced by removing the random slopes of the dummy variables, starting with the more complex ones (interaction of PSM and health-risk). The fit of each reduced model was compared to the fit of the initial model via the likelihood ratio test. The initial model was reduced by the random effects whose removal showed insignificant (or the lowest) detriment of fit. This was repeated until the fit of the reduced model estimated by both the maximum likelihood and the restricted maximum likelihood estimator was not singular. That model, estimated by restricted maximum likelihood estimator, was accepted as the final model.

### **Descriptive statistics**

Tables E4a, E4b and E5 show the descriptive statistics for the categorical and numerical variables used in the study.

**Table E4a***Descriptive statistics (percentages) of analyzed categorical variables across different countries*

| Country                | n            | Gender (%)   |              |             | Education (%) |                  |                  |                   |              |                |             |
|------------------------|--------------|--------------|--------------|-------------|---------------|------------------|------------------|-------------------|--------------|----------------|-------------|
|                        |              | Male         | Female       | Other       | None          | < 6 years school | < 9 years school | < 12 years school | Some college | College degree | PhD         |
| Bosnia and Herzegovina | 1003         | 24.13        | 75.27        | 0.60        | 0.20          | 0.10             | 0.20             | 15.65             | 18.15        | 60.42          | 5.28        |
| Bulgaria               | 3647         | 17.00        | 81.41        | 1.59        | 0.11          | 0.00             | 0.16             | 9.46              | 22.92        | 62.22          | 5.13        |
| Croatia                | 2397         | 20.48        | 79.27        | 0.25        | 0.21          | 0.21             | 0.38             | 15.64             | 16.10        | 62.16          | 5.30        |
| Czech Republic         | 1600         | 20.81        | 78.62        | 0.56        | 0.50          | 0.12             | 0.38             | 13.81             | 28.19        | 52.50          | 4.50        |
| Finland                | 19448        | 16.78        | 81.41        | 1.81        | 2.15          | 6.56             | 3.10             | 13.24             | 20.62        | 50.03          | 4.30        |
| France                 | 11226        | 46.71        | 51.75        | 1.54        | 0.94          | 1.23             | 0.68             | 7.82              | 21.21        | 58.15          | 9.98        |
| Germany                | 1192         | 29.28        | 69.30        | 1.43        | 0.08          | 0.08             | 0.59             | 11.41             | 19.30        | 57.30          | 11.24       |
| Japan                  | 4457         | 54.70        | 44.04        | 1.26        | 7.70          | 0.29             | 3.32             | 23.98             | 12.25        | 49.85          | 2.60        |
| Mexico                 | 7268         | 26.87        | 72.56        | 0.56        | 0.32          | 0.04             | 0.51             | 5.10              | 9.36         | 53.80          | 30.88       |
| Poland                 | 2433         | 12.45        | 86.93        | 0.62        | 0.33          | 0.00             | 0.66             | 15.37             | 23.10        | 55.61          | 4.93        |
| Sweden                 | 2574         | 22.92        | 76.07        | 1.01        | 0.12          | 0.12             | 1.79             | 17.17             | 16.94        | 55.63          | 8.24        |
| Switzerland            | 981          | 37.82        | 61.77        | 0.41        | 0.51          | 0.20             | 2.96             | 12.84             | 16.62        | 58.00          | 8.87        |
| Turkey                 | 888          | 23.65        | 75.34        | 1.01        | 0.11          | 0.00             | 0.11             | 3.49              | 4.62         | 57.66          | 34.01       |
| United Kingdom         | 1191         | 22.67        | 76.66        | 0.67        | 0.00          | 0.08             | 0.42             | 5.54              | 17.04        | 63.22          | 13.69       |
| United States          | 1924         | 21.52        | 76.56        | 1.92        | 0.16          | 0.00             | 0.21             | 3.22              | 18.19        | 57.59          | 20.63       |
| <b>Total</b>           | <b>62229</b> | <b>27.46</b> | <b>71.22</b> | <b>1.31</b> | <b>1.49</b>   | <b>2.32</b>      | <b>1.60</b>      | <b>11.62</b>      | <b>18.41</b> | <b>54.64</b>   | <b>9.92</b> |

**Table E4b**

*Descriptive statistics (percentages) of analysed categorical variables across different countries*

| Country                | Health-risk (%) |             |              | Isolation status (%)     |                                      |              |                                | Perception of strictness of COVID-19 measures (%) |                     |                    |
|------------------------|-----------------|-------------|--------------|--------------------------|--------------------------------------|--------------|--------------------------------|---------------------------------------------------|---------------------|--------------------|
|                        | No              | Not sure    | Yes          | Life carries on as usual | Life carries on with minimal changes | Isolated     | Isolated in a medical facility | Appropriate                                       | Too mild/Too little | Too harsh/Too much |
| Bosnia and Herzegovina | 63.71           | 8.67        | 27.62        | 3.59                     | 59.52                                | 36.69        | 0.20                           | 51.05                                             | 17.05               | 31.90              |
| Bulgaria               | 64.08           | 11.76       | 24.16        | 2.55                     | 40.50                                | 56.87        | 0.08                           | 47.68                                             | 23.75               | 28.57              |
| Croatia                | 71.71           | 7.55        | 20.73        | 1.71                     | 68.59                                | 29.66        | 0.04                           | 70.21                                             | 4.63                | 25.16              |
| Czech Republic         | 70.44           | 6.69        | 22.88        | 2.19                     | 78.31                                | 19.50        | 0.00                           | 66.56                                             | 8.50                | 24.94              |
| Finland                | 78.68           | 5.71        | 15.61        | 3.09                     | 60.31                                | 36.48        | 0.12                           | 71.39                                             | 12.81               | 15.80              |
| France                 | 66.83           | 8.59        | 24.59        | 4.48                     | 64.75                                | 30.70        | 0.07                           | 42.13                                             | 51.61               | 6.25               |
| Germany                | 67.53           | 7.80        | 24.66        | 2.94                     | 60.32                                | 36.74        | 0.00                           | 66.86                                             | 14.51               | 18.62              |
| Japan                  | 35.18           | 9.94        | 54.88        | 47.12                    | 51.78                                | 1.03         | 0.07                           | 34.46                                             | 61.52               | 4.02               |
| Mexico                 | 78.08           | 4.79        | 17.13        | 2.00                     | 31.80                                | 66.03        | 0.18                           | 37.99                                             | 46.27               | 15.74              |
| Poland                 | 86.97           | 2.38        | 10.65        | 0.99                     | 45.58                                | 53.39        | 0.04                           | 46.77                                             | 44.80               | 8.43               |
| Sweden                 | 75.37           | 4.35        | 20.28        | 2.41                     | 74.59                                | 23.00        | 0.00                           | 68.30                                             | 19.00               | 12.70              |
| Switzerland            | 66.87           | 7.65        | 25.48        | 2.24                     | 65.04                                | 32.62        | 0.10                           | 65.44                                             | 12.54               | 22.02              |
| Turkey                 | 77.70           | 6.64        | 15.65        | 1.01                     | 26.24                                | 72.52        | 0.23                           | 38.29                                             | 47.97               | 13.74              |
| United Kingdom         | 63.39           | 6.38        | 30.23        | 2.10                     | 40.72                                | 57.18        | 0.00                           | 43.24                                             | 47.10               | 9.66               |
| United States          | 76.04           | 3.90        | 20.06        | 1.35                     | 37.68                                | 60.86        | 0.10                           | 21.36                                             | 73.02               | 5.61               |
| <b>Total</b>           | <b>71.18</b>    | <b>6.78</b> | <b>22.04</b> | <b>6.04</b>              | <b>55.31</b>                         | <b>38.56</b> | <b>0.09</b>                    | <b>53.85</b>                                      | <b>32.05</b>        | <b>14.10</b>       |

*Note.* Health-risk – indicates whether the participants or any of their close relations (family, close friends) are in a high-risk group for Coronavirus (e.g., pregnant, elderly or due to a pre-existing medical condition); Isolation status - indicates whether the participants are in some form of isolation or their life continued as usual or with minimal changes (in the main analyses "isolated" and "isolated in a medical facility" were collapsed into "isolated", while the other two answer were collapsed into "not isolated")



**Table E5**

*Means and standard deviations (in brackets) for the numerical variables used in the study across 15 countries*

| Country                | Age                            | Compliance                   | N                            | E                            | O                            | C                            | A                            | SI                             |
|------------------------|--------------------------------|------------------------------|------------------------------|------------------------------|------------------------------|------------------------------|------------------------------|--------------------------------|
| Bosnia and Herzegovina | 36.61<br>(11.28)               | 5.30<br>(0.78)               | 3.11<br>(0.96)               | 4.46<br>(0.97)               | 4.67<br>(0.79)               | 4.72<br>(0.77)               | 4.56<br>(0.76)               | 88.90<br>(3.73)                |
| Bulgaria               | 41.02<br>(13.39)               | 5.12<br>(0.88)               | 3.05<br>(0.98)               | 4.50<br>(0.96)               | 4.72<br>(0.79)               | 4.88<br>(0.72)               | 4.38<br>(0.83)               | 71.05<br>(2.57)                |
| Croatia                | 35.59<br>(12.26)               | 5.29<br>(0.70)               | 3.21<br>(0.99)               | 4.35<br>(1.01)               | 4.65<br>(0.81)               | 4.59<br>(0.80)               | 4.49<br>(0.75)               | 96.23<br>(1.13)                |
| Czech Republic         | 33.25<br>(11.65)               | 4.95<br>(0.87)               | 3.60<br>(0.98)               | 3.85<br>(1.09)               | 4.42<br>(0.80)               | 3.82<br>(0.79)               | 4.05<br>(0.81)               | 71.01<br>(10.20)               |
| Finland                | 43.50<br>(14.03)               | 5.00<br>(0.88)               | 3.09<br>(1.03)               | 4.15<br>(1.12)               | 4.67<br>(0.87)               | 4.37<br>(0.83)               | 4.52<br>(0.76)               | 70.66<br>(1.43)                |
| France                 | 33.01<br>(12.49)               | 5.23<br>(0.84)               | 3.54<br>(1.11)               | 3.80<br>(1.19)               | 4.43<br>(0.93)               | 4.05<br>(0.92)               | 4.42<br>(0.86)               | 87.88<br>(0.92)                |
| Germany                | 36.71<br>(12.02)               | 5.00<br>(0.86)               | 3.16<br>(1.03)               | 4.01<br>(1.11)               | 4.65<br>(0.85)               | 4.34<br>(0.85)               | 4.34<br>(0.79)               | 75.76<br>(3.67)                |
| Japan                  | 44.57<br>(11.24)               | 4.12<br>(1.01)               | 3.79<br>(0.96)               | 3.12<br>(0.88)               | 3.37<br>(0.91)               | 3.54<br>(0.75)               | 3.63<br>(0.73)               | 43.60<br>(0.80)                |
| Mexico                 | 37.23<br>(13.56)               | 5.33<br>(0.78)               | 3.58<br>(0.97)               | 3.70<br>(1.14)               | 4.89<br>(0.74)               | 4.79<br>(0.78)               | 4.61<br>(0.82)               | 82.41<br>(0.00)                |
| Poland                 | 30.99<br>(7.23)                | 5.08<br>(0.85)               | 3.51<br>(0.95)               | 3.91<br>(0.99)               | 4.43<br>(0.85)               | 4.22<br>(0.80)               | 4.30<br>(0.73)               | 80.29<br>(5.66)                |
| Sweden                 | 46.45<br>(12.19)               | 4.96<br>(0.87)               | 2.91<br>(1.02)               | 4.21<br>(1.01)               | 4.45<br>(0.90)               | 4.53<br>(0.77)               | 4.72<br>(0.71)               | 64.71<br>(0.75)                |
| Switzerland            | 43.26<br>(17.57)               | 5.05<br>(0.80)               | 2.94<br>(1.00)               | 4.20<br>(1.04)               | 4.52<br>(0.83)               | 4.53<br>(0.79)               | 4.39<br>(0.78)               | 72.86<br>(1.78)                |
| Turkey                 | 32.50<br>(10.94)               | 5.28<br>(0.74)               | 3.42<br>(1.02)               | 4.49<br>(1.00)               | 4.72<br>(0.80)               | 4.50<br>(0.80)               | 4.40<br>(0.82)               | 75.94<br>(0.14)                |
| United Kingdom         | 39.79<br>(12.65)               | 5.21<br>(0.81)               | 3.35<br>(1.01)               | 3.86<br>(1.08)               | 4.56<br>(0.84)               | 4.39<br>(0.81)               | 4.49<br>(0.78)               | 79.40<br>(1.37)                |
| United States          | 42.91<br>(14.83)               | 5.15<br>(0.89)               | 3.43<br>(1.02)               | 3.82<br>(1.20)               | 4.65<br>(0.84)               | 4.52<br>(0.79)               | 4.57<br>(0.79)               | 72.69<br>(0.00)                |
| <b>Total</b>           | <b>39.38</b><br><b>(13.87)</b> | <b>5.05</b><br><b>(0.90)</b> | <b>3.32</b><br><b>(1.05)</b> | <b>3.96</b><br><b>(1.14)</b> | <b>4.53</b><br><b>(0.93)</b> | <b>4.34</b><br><b>(0.89)</b> | <b>4.42</b><br><b>(0.83)</b> | <b>75.08</b><br><b>(12.11)</b> |

*Note.* The table shows means and standard deviations for the original composite personality scale scores (not for the aligned personality scale scores). N = neuroticism, E = extraversion, O = openness, C = conscientiousness, A = agreeableness, SI = stringency index

## **Linear mixed models - Tables**

Tables E6-E10 show the estimated parameters of the study's linear mixed models.

**Table E6**

*Fixed and random effects of the linear mixed model predicting aligned neuroticism scores*

| Parameter                              | $\beta$ | $\beta$ CI 95%   | $b$    | $b$ CI 95%       | $b$ SE | t       | df        | $p$   |
|----------------------------------------|---------|------------------|--------|------------------|--------|---------|-----------|-------|
| Intercept                              | -0.297  | [-0.541, -0.053] | 4.696  | [4.469, 4.922]   | 0.108  | 43.553  | 18.078    | <.001 |
| PSM-TM                                 | 0.075   | [0.030, 0.119]   | 0.068  | [0.027, 0.108]   | 0.019  | 3.621   | 13.454    | .003  |
| PSM-TH                                 | -0.039  | [-0.062, -0.016] | -0.035 | [-0.056, -0.014] | 0.011  | -3.292  | 61830.816 | .001  |
| SI                                     | -0.047  | [-0.080, -0.014] | -0.043 | [-0.073, -0.013] | 0.015  | -2.826  | 3134.668  | .005  |
| PSM-TM $\times$ SI                     | -0.002  | [-0.039, 0.035]  | -0.002 | [-0.035, 0.031]  | 0.016  | -0.123  | 14.922    | .904  |
| PSM-TH $\times$ SI                     | 0.005   | [-0.018, 0.028]  | 0.005  | [-0.016, 0.025]  | 0.011  | 0.437   | 59785.749 | .662  |
| Health-risk - Not sure                 | 0.091   | [0.055, 0.126]   | 0.082  | [0.050, 0.114]   | 0.016  | 5.047   | 62135.394 | <.001 |
| Health-risk - No                       | -0.074  | [-0.096, -0.051] | -0.067 | [-0.087, -0.047] | 0.010  | -6.525  | 60261.696 | <.001 |
| PSM-TM $\times$ Health-risk - Not sure | -0.081  | [-0.138, -0.024] | -0.073 | [-0.125, -0.021] | 0.026  | -2.768  | 60891.121 | .006  |
| PSM-TH $\times$ Health-risk - Not sure | -0.032  | [-0.109, 0.046]  | -0.029 | [-0.099, 0.042]  | 0.036  | -0.799  | 62184.076 | .424  |
| PSM-TM $\times$ Health-risk - No       | -0.055  | [-0.091, -0.019] | -0.050 | [-0.082, -0.017] | 0.017  | -3.000  | 48897.202 | .003  |
| PSM-TH $\times$ Health-risk - No       | 0.007   | [-0.038, 0.053]  | 0.006  | [-0.035, 0.048]  | 0.021  | 0.306   | 62187.073 | .760  |
| Gender - Female                        | 0.383   | [0.367, 0.398]   | 0.347  | [0.333, 0.361]   | 0.007  | 48.984  | 62183.386 | <.001 |
| Gender - Other/would rather not say    | 0.358   | [0.301, 0.415]   | 0.324  | [0.273, 0.376]   | 0.026  | 12.264  | 62187.957 | <.001 |
| Age                                    | -0.172  | [-0.179, -0.165] | -0.011 | [-0.012, -0.011] | 0.000  | -47.341 | 61969.144 | <.001 |
| Education – up to 6 years of school    | 0.011   | [-0.057, 0.078]  | 0.010  | [-0.051, 0.071]  | 0.031  | 0.312   | 62179.862 | .755  |
| Education – up to 9 years of school    | 0.051   | [-0.022, 0.123]  | 0.046  | [-0.020, 0.112]  | 0.034  | 1.364   | 62178.400 | .173  |
| Education – up to 12 years of school   | 0.017   | [-0.038, 0.073]  | 0.016  | [-0.035, 0.066]  | 0.026  | 0.609   | 62181.921 | .542  |
| Education - Some college               | -0.062  | [-0.117, -0.007] | -0.056 | [-0.106, -0.006] | 0.025  | -2.215  | 62186.286 | .027  |
| Education - College degree             | -0.068  | [-0.121, -0.014] | -0.061 | [-0.110, -0.013] | 0.025  | -2.479  | 62188.148 | .013  |
| Education - PhD                        | -0.082  | [-0.140, -0.025] | -0.075 | [-0.127, -0.023] | 0.027  | -2.808  | 62192.259 | .005  |
| Isolation - Isolated                   | 0.102   | [0.088, 0.117]   | 0.093  | [0.080, 0.106]   | 0.007  | 14.144  | 62140.383 | <.001 |
| Compliance                             | 0.008   | [0.001, 0.015]   | 0.008  | [0.001, 0.015]   | 0.004  | 2.273   | 62129.958 | .023  |
| Extraversion                           | -0.116  | [-0.124, -0.109] | -0.106 | [-0.112, -0.099] | 0.003  | -31.722 | 62194.848 | <.001 |
| Openness                               | 0.020   | [0.013, 0.027]   | 0.021  | [0.013, 0.029]   | 0.004  | 5.392   | 62194.260 | <.001 |
| Conscientiousness                      | -0.113  | [-0.120, -0.105] | -0.139 | [-0.148, -0.129] | 0.005  | -29.130 | 62157.851 | <.001 |
| Agreeableness                          | -0.114  | [-0.121, -0.107] | -0.145 | [-0.154, -0.136] | 0.005  | -31.715 | 62196.153 | <.001 |
| <i>SD</i> (Intercept)                  | 0.431   |                  | 0.391  |                  |        |         |           |       |
| <i>SD</i> (PSM-TM)                     | 0.063   |                  | 0.057  |                  |        |         |           |       |
| Cor (Intercept - PSM-TM)               | 0.367   |                  | 0.367  |                  |        |         |           |       |
| <i>SD</i> (Residual)                   | 0.809   |                  | 0.734  |                  |        |         |           |       |

*Note. PSM-TM – regression coefficient illustrating the difference between too mild/too little and appropriate groups, PSM-TH - regression coefficient illustrating the difference between too harsh/too much and appropriate groups, SI - stringency index, SD – standard deviation, Cor - correlation. The reference group for Gender - male, for Education - no education, for Health-risk - yes (i.e., the person or their close relations are in a high-risk group for coronavirus), and for Isolation - not isolated*

**Table E7***Fixed and random effects of the linear mixed model predicting aligned extraversion scores*

| Parameter                              | $\beta$ | $\beta$ CI 95%   | $b$    | $b$ CI 95%       | $b$ SE | t       | df        | $p$   |
|----------------------------------------|---------|------------------|--------|------------------|--------|---------|-----------|-------|
| Intercept                              | -0.147  | [-0.301, 0.008]  | 1.813  | [1.643, 1.984]   | 0.084  | 21.669  | 33.000    | <.001 |
| PSM-TM                                 | -0.026  | [-0.046, -0.006] | -0.026 | [-0.046, -0.006] | 0.010  | -2.556  | 8736.134  | .011  |
| PSM-TH                                 | 0.058   | [0.018, 0.098]   | 0.058  | [0.018, 0.098]   | 0.019  | 3.043   | 20.152    | .006  |
| SI                                     | 0.004   | [-0.031, 0.039]  | 0.004  | [-0.031, 0.039]  | 0.018  | 0.208   | 1947.704  | .835  |
| PSM-TM $\times$ SI                     | -0.005  | [-0.021, 0.011]  | -0.005 | [-0.021, 0.011]  | 0.008  | -0.604  | 31521.729 | .546  |
| PSM-TH $\times$ SI                     | 0.005   | [-0.028, 0.038]  | 0.005  | [-0.028, 0.038]  | 0.016  | 0.291   | 21.714    | .774  |
| Health-risk - Not sure                 | -0.053  | [-0.091, -0.015] | -0.053 | [-0.091, -0.015] | 0.019  | -2.729  | 61534.723 | .006  |
| Health-risk - No                       | 0.053   | [0.014, 0.092]   | 0.053  | [0.014, 0.092]   | 0.018  | 2.904   | 14.776    | .011  |
| PSM-TM $\times$ Health-risk - Not sure | 0.072   | [0.011, 0.134]   | 0.072  | [0.011, 0.134]   | 0.031  | 2.298   | 62059.379 | .022  |
| PSM-TH $\times$ Health-risk - Not sure | 0.044   | [-0.041, 0.128]  | 0.044  | [-0.041, 0.128]  | 0.043  | 1.016   | 50584.828 | .310  |
| PSM-TM $\times$ Health-risk - No       | 0.042   | [0.002, 0.083]   | 0.042  | [0.002, 0.083]   | 0.021  | 2.048   | 2241.051  | .041  |
| PSM-TH $\times$ Health-risk - No       | -0.039  | [-0.089, 0.012]  | -0.039 | [-0.089, 0.012]  | 0.026  | -1.505  | 11805.841 | .132  |
| Gender - Female                        | 0.215   | [0.198, 0.232]   | 0.215  | [0.198, 0.232]   | 0.009  | 25.076  | 62016.709 | <.001 |
| Gender - Other/would rather not say    | -0.185  | [-0.247, -0.123] | -0.185 | [-0.247, -0.123] | 0.032  | -5.847  | 62181.041 | <.001 |
| Age                                    | 0.045   | [0.037, 0.053]   | 0.003  | [0.003, 0.004]   | 0.000  | 11.297  | 60467.515 | <.001 |
| Education – up to 6 years of school    | 0.077   | [0.004, 0.150]   | 0.077  | [0.004, 0.150]   | 0.037  | 2.070   | 62177.502 | .038  |
| Education – up to 9 years of school    | 0.095   | [0.017, 0.174]   | 0.095  | [0.017, 0.174]   | 0.040  | 2.372   | 62174.000 | .018  |
| Education – up to 12 years of school   | 0.070   | [0.010, 0.130]   | 0.070  | [0.010, 0.130]   | 0.031  | 2.273   | 62179.258 | .023  |
| Education - Some college               | 0.044   | [-0.015, 0.104]  | 0.044  | [-0.015, 0.104]  | 0.030  | 1.453   | 62181.218 | .146  |
| Education - College degree             | 0.057   | [-0.001, 0.115]  | 0.057  | [-0.001, 0.115]  | 0.030  | 1.932   | 62185.715 | .053  |
| Education - PhD                        | -0.010  | [-0.072, 0.052]  | -0.010 | [-0.072, 0.052]  | 0.032  | -0.320  | 62179.308 | .749  |
| Isolation - Isolated                   | 0.055   | [0.040, 0.071]   | 0.055  | [0.040, 0.071]   | 0.008  | 7.031   | 62107.494 | <.001 |
| Compliance                             | -0.021  | [-0.029, -0.014] | -0.024 | [-0.032, -0.015] | 0.004  | -5.408  | 62062.254 | <.001 |
| Neuroticism                            | -0.137  | [-0.146, -0.129] | -0.151 | [-0.161, -0.142] | 0.005  | -31.850 | 61960.774 | <.001 |
| Openness                               | 0.150   | [0.142, 0.158]   | 0.177  | [0.168, 0.186]   | 0.005  | 38.175  | 62085.973 | <.001 |
| Conscientiousness                      | 0.108   | [0.100, 0.116]   | 0.147  | [0.136, 0.158]   | 0.006  | 25.840  | 61917.602 | <.001 |
| Agreeableness                          | 0.173   | [0.165, 0.180]   | 0.243  | [0.232, 0.253]   | 0.005  | 44.685  | 62094.298 | <.001 |
| <i>SD</i> (Intercept)                  | 0.260   |                  | 0.260  |                  |        |         |           |       |
| <i>SD</i> (PSM-TH)                     | 0.045   |                  | 0.045  |                  |        |         |           |       |
| <i>SD</i> (Health-risk - No)           | 0.044   |                  | 0.044  |                  |        |         |           |       |
| Cor (Intercept - PSM-TH)               | -0.633  |                  | -0.633 |                  |        |         |           |       |
| Cor (Intercept - Health-risk - No)     | 0.239   |                  | 0.240  |                  |        |         |           |       |
| Cor (PSM-TH - Health-risk - No)        | -0.468  |                  | -0.468 |                  |        |         |           |       |
| <i>SD</i> (Residual)                   | 0.877   |                  | 0.877  |                  |        |         |           |       |

*Note.* PSM-TM – regression coefficient illustrating the difference between too mild/too little and appropriate groups, PSM-TH – regression coefficient illustrating the difference between too harsh/too much and appropriate groups, SI - stringency index, SD – standard deviation, Cor - correlation. The reference group for Gender - male, for Education - no education, for Health-risk - yes (i.e., the person or their close relations are in a high-risk group for coronavirus), and for Isolation - not isolated

**Table E8**

*Fixed and random effects of the linear mixed model predicting aligned openness scores*

| Parameter                            | $\beta$ | $\beta$ CI 95%   | <i>b</i> | <i>b</i> CI 95%  | <i>b</i> SE | t       | df        | <i>p</i> |
|--------------------------------------|---------|------------------|----------|------------------|-------------|---------|-----------|----------|
| Intercept                            | -0.160  | [-0.399, 0.079]  | 2.317    | [2.107, 2.527]   | 0.101       | 22.962  | 20.238    | <.001    |
| PSM-TM                               | 0.073   | [0.028, 0.118]   | 0.062    | [0.024, 0.100]   | 0.018       | 3.479   | 14.010    | .004     |
| PSM-TH                               | 0.001   | [-0.024, 0.026]  | 0.001    | [-0.020, 0.022]  | 0.011       | 0.093   | 58676.016 | .926     |
| SI                                   | -0.017  | [-0.053, 0.019]  | -0.014   | [-0.045, 0.016]  | 0.016       | -0.912  | 3059.976  | .362     |
| PSM-TM × SI                          | 0.026   | [-0.012, 0.065]  | 0.022    | [-0.010, 0.055]  | 0.015       | 1.485   | 13.037    | .161     |
| PSM-TH × SI                          | 0.028   | [0.003, 0.053]   | 0.024    | [0.003, 0.045]   | 0.011       | 2.211   | 59988.271 | .027     |
| Health-risk - Not sure               | -0.017  | [-0.056, 0.021]  | -0.014   | [-0.047, 0.018]  | 0.017       | -0.873  | 61435.854 | .382     |
| Health-risk - No                     | -0.058  | [-0.097, -0.018] | -0.049   | [-0.082, -0.015] | 0.016       | -3.067  | 16.600    | .007     |
| PSM-TM × Health-risk - Not sure      | -0.006  | [-0.069, 0.056]  | -0.005   | [-0.058, 0.047]  | 0.027       | -0.204  | 60468.577 | .839     |
| PSM-TH × Health-risk - Not sure      | 0.070   | [-0.015, 0.154]  | 0.059    | [-0.013, 0.131]  | 0.037       | 1.606   | 62175.907 | .108     |
| PSM-TM × Health-risk - No            | -0.021  | [-0.063, 0.021]  | -0.018   | [-0.053, 0.018]  | 0.018       | -0.986  | 1776.853  | .324     |
| PSM-TH × Health-risk - No            | 0.012   | [-0.039, 0.062]  | 0.010    | [-0.033, 0.052]  | 0.022       | 0.449   | 37854.611 | .653     |
| Gender - Female                      | -0.101  | [-0.118, -0.084] | -0.086   | [-0.100, -0.071] | 0.007       | -11.655 | 62185.746 | <.001    |
| Gender - Other/would rather not say  | 0.301   | [0.239, 0.364]   | 0.255    | [0.202, 0.308]   | 0.027       | 9.454   | 62184.312 | <.001    |
| Age                                  | 0.005   | [-0.003, 0.013]  | 0.000    | [-0.000, 0.001]  | 0.000       | 1.211   | 61949.966 | .226     |
| Education – up to 6 years of school  | -0.011  | [-0.084, 0.063]  | -0.009   | [-0.072, 0.053]  | 0.032       | -0.286  | 62171.435 | .775     |
| Education – up to 9 years of school  | -0.030  | [-0.109, 0.050]  | -0.025   | [-0.092, 0.042]  | 0.034       | -0.731  | 62165.682 | .465     |
| Education – up to 12 years of school | 0.020   | [-0.041, 0.080]  | 0.017    | [-0.035, 0.068]  | 0.026       | 0.633   | 62172.435 | .527     |
| Education - Some college             | 0.181   | [0.121, 0.240]   | 0.153    | [0.102, 0.204]   | 0.026       | 5.906   | 62178.724 | <.001    |
| Education - College degree           | 0.167   | [0.109, 0.225]   | 0.141    | [0.092, 0.191]   | 0.025       | 5.598   | 62182.827 | <.001    |
| Education - PhD                      | 0.256   | [0.193, 0.319]   | 0.217    | [0.163, 0.270]   | 0.027       | 7.995   | 62192.884 | <.001    |
| Isolation - Isolated                 | 0.073   | [0.057, 0.088]   | 0.062    | [0.049, 0.075]   | 0.007       | 9.201   | 62046.926 | <.001    |
| Compliance                           | 0.092   | [0.084, 0.100]   | 0.086    | [0.079, 0.093]   | 0.004       | 23.260  | 62136.276 | <.001    |
| Neuroticism                          | 0.024   | [0.015, 0.032]   | 0.022    | [0.014, 0.030]   | 0.004       | 5.379   | 62149.482 | <.001    |
| Extraversion                         | 0.152   | [0.145, 0.160]   | 0.129    | [0.122, 0.136]   | 0.003       | 38.169  | 62192.251 | <.001    |
| Conscientiousness                    | 0.088   | [0.080, 0.096]   | 0.101    | [0.092, 0.111]   | 0.005       | 20.809  | 62182.056 | <.001    |
| Agreeableness                        | 0.056   | [0.048, 0.063]   | 0.066    | [0.057, 0.075]   | 0.005       | 14.068  | 62183.083 | <.001    |
| <i>SD</i> (Intercept)                | 0.420   |                  | 0.355    |                  |             |         |           |          |
| <i>SD</i> (PSM-TM)                   | 0.062   |                  | 0.053    |                  |             |         |           |          |
| <i>SD</i> (Health-risk - No)         | 0.046   |                  | 0.039    |                  |             |         |           |          |
| Cor (Intercept - PSM-TM)             | -0.366  |                  | -0.366   |                  |             |         |           |          |
| Cor (Intercept - Health-risk - No)   | 0.186   |                  | 0.186    |                  |             |         |           |          |
| Cor (PSM-TM - Health-risk - No)      | -0.197  |                  | -0.197   |                  |             |         |           |          |
| <i>SD</i> (Residual)                 | 0.884   |                  | 0.748    |                  |             |         |           |          |

*Note.* PSM-TM – regression coefficient illustrating the difference between too mild/too little and appropriate groups, PSM-TH - regression coefficient illustrating the difference between too harsh/too much and appropriate groups, SI - stringency index, SD – standard deviation, Cor - correlation. The reference group for Gender - male, for Education - no education, for Health-risk - yes (i.e., the person or their close relations are in a high-risk group for coronavirus), and for Isolation - not isolated

**Table E9**

*Fixed and random effects of the linear mixed model predicting aligned conscientiousness scores*

| Parameter                              | $\beta$ | $\beta$ CI 95%   | $b$    | $b$ CI 95%       | $b$ SE | t       | df        | $p$   |
|----------------------------------------|---------|------------------|--------|------------------|--------|---------|-----------|-------|
| Intercept                              | -0.181  | [-0.480, 0.119]  | 2.175  | [1.950, 2.400]   | 0.107  | 20.351  | 17.302    | <.001 |
| PSM-TM                                 | 0.020   | [-0.039, 0.079]  | 0.015  | [-0.029, 0.058]  | 0.020  | 0.737   | 12.253    | .475  |
| PSM-TH                                 | 0.091   | [0.067, 0.115]   | 0.067  | [0.049, 0.084]   | 0.009  | 7.462   | 62085.311 | <.001 |
| SI                                     | 0.024   | [-0.011, 0.059]  | 0.018  | [-0.008, 0.043]  | 0.013  | 1.340   | 4170.164  | .180  |
| PSM-TM $\times$ SI                     | -0.006  | [-0.047, 0.034]  | -0.005 | [-0.035, 0.025]  | 0.014  | -0.333  | 18.741    | .743  |
| PSM-TH $\times$ SI                     | -0.014  | [-0.038, 0.010]  | -0.010 | [-0.028, 0.007]  | 0.009  | -1.168  | 61178.754 | .243  |
| Health-risk - Not sure                 | -0.090  | [-0.126, -0.053] | -0.066 | [-0.093, -0.039] | 0.014  | -4.848  | 62177.087 | <.001 |
| Health-risk - No                       | 0.036   | [0.013, 0.058]   | 0.026  | [0.009, 0.043]   | 0.009  | 3.065   | 61525.262 | .002  |
| PSM-TM $\times$ Health-risk - Not sure | 0.008   | [-0.051, 0.066]  | 0.006  | [-0.038, 0.049]  | 0.022  | 0.254   | 61488.588 | .799  |
| PSM-TH $\times$ Health-risk - Not sure | -0.032  | [-0.112, 0.048]  | -0.023 | [-0.082, 0.035]  | 0.030  | -0.780  | 62181.924 | .435  |
| PSM-TM $\times$ Health-risk - No       | 0.015   | [-0.023, 0.052]  | 0.011  | [-0.017, 0.038]  | 0.014  | 0.770   | 54405.957 | .441  |
| PSM-TH $\times$ Health-risk - No       | 0.070   | [0.023, 0.117]   | 0.051  | [0.017, 0.086]   | 0.018  | 2.903   | 62188.046 | .004  |
| Gender - Female                        | 0.235   | [0.219, 0.251]   | 0.173  | [0.161, 0.185]   | 0.006  | 28.851  | 62193.696 | <.001 |
| Gender - Other/would rather not say    | -0.003  | [-0.062, 0.056]  | -0.002 | [-0.045, 0.041]  | 0.022  | -0.091  | 62186.107 | .928  |
| Age                                    | 0.109   | [0.102, 0.117]   | 0.006  | [0.005, 0.006]   | 0.000  | 28.787  | 62123.204 | <.001 |
| Education – up to 6 years of school    | 0.061   | [-0.009, 0.130]  | 0.045  | [-0.007, 0.096]  | 0.026  | 1.709   | 62180.727 | .087  |
| Education – up to 9 years of school    | 0.046   | [-0.029, 0.121]  | 0.034  | [-0.021, 0.089]  | 0.028  | 1.201   | 62178.517 | .230  |
| Education – up to 12 years of school   | 0.013   | [-0.044, 0.070]  | 0.010  | [-0.033, 0.052]  | 0.022  | 0.445   | 62181.667 | .656  |
| Education - Some college               | -0.057  | [-0.114, -0.001] | -0.042 | [-0.084, -0.001] | 0.021  | -1.985  | 62184.316 | .047  |
| Education - College degree             | 0.081   | [0.026, 0.136]   | 0.060  | [0.019, 0.100]   | 0.021  | 2.878   | 62186.152 | .004  |
| Education - PhD                        | 0.220   | [0.160, 0.279]   | 0.162  | [0.118, 0.205]   | 0.022  | 7.273   | 62190.009 | <.001 |
| Isolation - Isolated                   | -0.075  | [-0.090, -0.060] | -0.055 | [-0.066, -0.044] | 0.006  | -10.023 | 62131.290 | <.001 |
| Compliance                             | 0.140   | [0.132, 0.147]   | 0.114  | [0.108, 0.120]   | 0.003  | 37.674  | 62169.828 | <.001 |
| Neuroticism                            | -0.120  | [-0.128, -0.112] | -0.097 | [-0.104, -0.091] | 0.003  | -29.136 | 62159.003 | <.001 |
| Extraversion                           | 0.098   | [0.091, 0.106]   | 0.072  | [0.067, 0.078]   | 0.003  | 25.892  | 62191.373 | <.001 |
| Openness                               | 0.079   | [0.071, 0.086]   | 0.068  | [0.062, 0.075]   | 0.003  | 20.815  | 62197.133 | <.001 |
| Agreeableness                          | 0.111   | [0.104, 0.118]   | 0.115  | [0.107, 0.122]   | 0.004  | 29.875  | 62183.478 | <.001 |
| $SD$ (Intercept)                       | 0.533   |                  | 0.392  |                  |        |         |           |       |
| $SD$ (PSM-TM)                          | 0.092   |                  | 0.067  |                  |        |         |           |       |
| Cor (Intercept - PSM-TM)               | -0.674  |                  | -0.674 |                  |        |         |           |       |
| $SD$ (Residual)                        | 0.834   |                  | 0.614  |                  |        |         |           |       |

*Note. PSM-TM – regression coefficient illustrating the difference between too mild/too little and appropriate groups, PSM-TH - regression coefficient illustrating the difference between too harsh/too much and appropriate groups, SI - stringency index, SD – standard deviation, Cor - correlation. The reference group for Gender - male, for Education - no education, for Health-risk - yes (i.e., the person or their close relations are in a high-risk group for coronavirus), and for Isolation - not isolated*

**Table E10**

*Fixed and random effects of the linear mixed model predicting aligned agreeableness scores*

| Parameter                            | $\beta$ | $\beta$ CI 95%   | $b$    | $b$ CI 95%       | $b$ SE | t       | df        | $p$   |
|--------------------------------------|---------|------------------|--------|------------------|--------|---------|-----------|-------|
| Intercept                            | -0.132  | [-0.361, 0.097]  | 2.936  | [2.766, 3.106]   | 0.082  | 35.991  | 20.676    | <.001 |
| PSM-TM                               | -0.064  | [-0.085, -0.044] | -0.046 | [-0.060, -0.031] | 0.007  | -6.244  | 62201.858 | <.001 |
| PSM-TH                               | -0.018  | [-0.044, 0.008]  | -0.013 | [-0.031, 0.005]  | 0.009  | -1.382  | 62192.987 | .167  |
| SI                                   | -0.019  | [-0.055, 0.017]  | -0.014 | [-0.039, 0.012]  | 0.013  | -1.048  | 15317.747 | .295  |
| PSM-TM × SI                          | 0.008   | [-0.009, 0.024]  | 0.005  | [-0.006, 0.017]  | 0.006  | 0.921   | 62193.838 | .357  |
| PSM-TH × SI                          | 0.006   | [-0.019, 0.031]  | 0.004  | [-0.014, 0.022]  | 0.009  | 0.475   | 62200.516 | .635  |
| Health-risk - Not sure               | -0.007  | [-0.046, 0.032]  | -0.005 | [-0.033, 0.023]  | 0.014  | -0.350  | 62188.899 | .726  |
| Health-risk - No                     | -0.008  | [-0.033, 0.016]  | -0.006 | [-0.023, 0.011]  | 0.009  | -0.668  | 62191.933 | .504  |
| PSM-TM × Health-risk - Not sure      | -0.052  | [-0.115, 0.011]  | -0.037 | [-0.082, 0.008]  | 0.023  | -1.622  | 62188.409 | .105  |
| PSM-TH × Health-risk - Not sure      | 0.023   | [-0.063, 0.109]  | 0.016  | [-0.045, 0.077]  | 0.031  | 0.524   | 62188.268 | .601  |
| PSM-TM × Health-risk - No            | -0.023  | [-0.062, 0.016]  | -0.016 | [-0.044, 0.012]  | 0.014  | -1.147  | 62188.735 | .251  |
| PSM-TH × Health-risk - No            | 0.013   | [-0.037, 0.064]  | 0.009  | [-0.026, 0.045]  | 0.018  | 0.518   | 62189.110 | .604  |
| Gender - Female                      | 0.132   | [0.115, 0.150]   | 0.094  | [0.082, 0.107]   | 0.006  | 15.088  | 62197.373 | <.001 |
| Gender - Other/would rather not say  | -0.002  | [-0.065, 0.062]  | -0.001 | [-0.046, 0.044]  | 0.023  | -0.050  | 62188.875 | .960  |
| Age                                  | -0.050  | [-0.058, -0.042] | -0.003 | [-0.003, -0.002] | 0.000  | -12.212 | 62201.612 | <.001 |
| Education – up to 6 years of school  | 0.020   | [-0.055, 0.095]  | 0.014  | [-0.039, 0.067]  | 0.027  | 0.527   | 62189.692 | .598  |
| Education – up to 9 years of school  | -0.054  | [-0.135, 0.026]  | -0.039 | [-0.096, 0.018]  | 0.029  | -1.326  | 62188.934 | .185  |
| Education – up to 12 years of school | -0.032  | [-0.094, 0.030]  | -0.023 | [-0.067, 0.021]  | 0.022  | -1.019  | 62191.594 | .308  |
| Education - Some college             | -0.024  | [-0.085, 0.036]  | -0.017 | [-0.060, 0.026]  | 0.022  | -0.782  | 62190.753 | .434  |
| Education - College degree           | -0.064  | [-0.123, -0.005] | -0.046 | [-0.088, -0.003] | 0.022  | -2.121  | 62190.985 | .034  |
| Education - PhD                      | -0.084  | [-0.147, -0.020] | -0.060 | [-0.105, -0.014] | 0.023  | -2.582  | 62194.282 | .010  |
| Isolation - Isolated                 | 0.002   | [-0.013, 0.018]  | 0.002  | [-0.010, 0.013]  | 0.006  | 0.285   | 62200.355 | .776  |
| Compliance                           | 0.114   | [0.106, 0.122]   | 0.090  | [0.084, 0.096]   | 0.003  | 28.669  | 62195.871 | <.001 |
| Neuroticism                          | -0.139  | [-0.148, -0.131] | -0.109 | [-0.116, -0.103] | 0.003  | -31.677 | 62200.883 | <.001 |
| Extraversion                         | 0.180   | [0.172, 0.188]   | 0.128  | [0.123, 0.134]   | 0.003  | 44.707  | 62195.591 | <.001 |
| Openness                             | 0.057   | [0.049, 0.065]   | 0.048  | [0.041, 0.055]   | 0.003  | 14.113  | 62201.970 | <.001 |
| Conscientiousness                    | 0.127   | [0.119, 0.136]   | 0.123  | [0.115, 0.131]   | 0.004  | 29.842  | 62189.570 | <.001 |
| <i>SD</i> (Intercept)                | 0.402   |                  | 0.286  |                  |        |         |           |       |
| <i>SD</i> (Residual)                 | 0.895   |                  | 0.637  |                  |        |         |           |       |

*Note. PSM-TM – regression coefficient illustrating the difference between too mild/too little and appropriate groups, PSM-TH – regression coefficient illustrating the difference between too harsh/too much and appropriate groups, SI - stringency index, SD – standard deviation, Cor - correlation. The reference group for Gender - male, for Education - no education, for Health-risk - yes (i.e., the person or their close relations are in a high-risk group for coronavirus), and for Isolation - not isolated*

Table E11 shows the estimated marginal means of aligned personality scores and post-hoc tests

between groups of PSM for significant interactions (PSM and health-risk for neuroticism, extraversion, and conscientiousness, and PSM and stringency index for openness).

**Table E11**

*Estimated marginal means (unstandardized) of aligned personality scores, their standard errors, and post-hoc tests for significant interactions with PSM*

|                   |                  |              | Perception of strictness of COVID-19 measures |       |              |       |               |       | Significant differences |
|-------------------|------------------|--------------|-----------------------------------------------|-------|--------------|-------|---------------|-------|-------------------------|
|                   |                  |              | Appropriate (1)                               |       | Too mild (2) |       | Too harsh (3) |       |                         |
| Interaction with  | Levels           |              | M                                             | SE    | M            | SE    | M             | SE    |                         |
| Neuroticism       | Health-risk      | Yes          | 3.087                                         | 0.102 | 3.155        | 0.108 | 3.052         | 0.102 | 1-2**, 1-3**, 2-3**     |
|                   |                  | Not sure     | 3.169                                         | 0.103 | 3.164        | 0.110 | 3.106         | 0.106 | -                       |
|                   |                  | No           | 3.021                                         | 0.102 | 3.038        | 0.109 | 2.992         | 0.103 | -                       |
| Extraversion      | Health-risk      | Yes          | 3.758                                         | 0.069 | 3.732        | 0.069 | 3.816         | 0.063 | 1-2*, 1-3**, 2-3**      |
|                   |                  | Not sure     | 3.705                                         | 0.071 | 3.751        | 0.072 | 3.807         | 0.072 | 1-3*                    |
|                   |                  | No           | 3.811                                         | 0.073 | 3.827        | 0.074 | 3.831         | 0.068 | -                       |
| Openness          | Stringency Index | Low (SI=63)  | 4.144                                         | 0.095 | 4.176        | 0.091 | 4.144         | 0.096 | -                       |
|                   |                  | Mid (SI=75)  | 4.130                                         | 0.093 | 4.184        | 0.090 | 4.153         | 0.094 | 1-2*                    |
|                   |                  | High (SI=87) | 4.116                                         | 0.094 | 4.192        | 0.091 | 4.163         | 0.095 | 1-2**, 1-3*             |
| Conscientiousness | Health-risk      | Yes          | 3.784                                         | 0.102 | 3.798        | 0.091 | 3.850         | 0.102 | 1-3**, 2-3*             |
|                   |                  | Not sure     | 3.718                                         | 0.102 | 3.738        | 0.092 | 3.761         | 0.105 | -                       |
|                   |                  | No           | 3.810                                         | 0.102 | 3.835        | 0.092 | 3.928         | 0.102 | 1-3**, 2-3**            |

*Note.* \*  $p < .05$ ; \*\*  $p < .01$ ; marginal means were estimated across all levels of categorical covariates while keeping the numerical covariates fixed at their mean values; p-values were adjusted via the Tukey post-hoc test



Tables E12-16 show estimated random PSM-TM and PSM-TH effects across countries.

**Table E12**

*Estimated random intercepts, PSM-TM and PSM-TH coefficients for different countries when predicting aligned neuroticism scores (unstandardized)*

| Country                | Intercept | PSM-TM | PSM-TH |
|------------------------|-----------|--------|--------|
| Bosnia and Herzegovina | 4.282     | 0.041  | -0.035 |
| Bulgaria               | 4.441     | -0.020 | -0.035 |
| Croatia                | 4.363     | 0.026  | -0.035 |
| Czech Republic         | 4.579     | 0.065  | -0.035 |
| Finland                | 4.295     | 0.042  | -0.035 |
| France                 | 5.051     | 0.126  | -0.035 |
| Germany                | 4.666     | 0.046  | -0.035 |
| Japan                  | 5.106     | 0.093  | -0.035 |
| Mexico                 | 5.500     | 0.064  | -0.035 |
| Poland                 | 4.342     | 0.041  | -0.035 |
| Sweden                 | 4.587     | 0.073  | -0.035 |
| Switzerland            | 4.736     | 0.092  | -0.035 |
| Turkey                 | 4.372     | 0.060  | -0.035 |
| United Kingdom         | 4.777     | 0.181  | -0.035 |
| United States          | 5.344     | 0.084  | -0.035 |

*Note.* The random coefficients were calculated by summing the fixed effects and their respective random effects. A constant fixed effect is shown across countries when random effects were not significant.

**Table E13**

*Estimated random intercepts, PSM-TM and PSM-TH coefficients for different countries when predicting aligned extraversion scores (unstandardized)*

| Country                | Intercept | PSM-TM | PSM-TH |
|------------------------|-----------|--------|--------|
| Bosnia and Herzegovina | 2.205     | -0.026 | 0.012  |
| Bulgaria               | 1.748     | -0.026 | 0.055  |
| Croatia                | 2.113     | -0.026 | 0.042  |
| Czech Republic         | 2.068     | -0.026 | 0.039  |
| Finland                | 1.739     | -0.026 | 0.101  |
| France                 | 1.290     | -0.026 | 0.112  |
| Germany                | 1.569     | -0.026 | 0.101  |
| Japan                  | 1.706     | -0.026 | 0.070  |
| Mexico                 | 1.964     | -0.026 | -0.015 |
| Poland                 | 2.064     | -0.026 | 0.027  |
| Sweden                 | 1.976     | -0.026 | 0.067  |
| Switzerland            | 1.528     | -0.026 | 0.081  |
| Turkey                 | 1.945     | -0.026 | 0.039  |
| United Kingdom         | 1.597     | -0.026 | 0.077  |
| United States          | 1.691     | -0.026 | 0.068  |

*Note.* The random coefficients were calculated by summing the fixed effects and their respective random effects. A constant fixed effect is shown across countries when random effects were not significant.

**Table E14**

*Estimated random intercepts, PSM-TM and PSM-TH coefficients for different countries when predicting aligned openness scores (unstandardized)*

| Country                | Intercept | PSM-TM | PSM-TH |
|------------------------|-----------|--------|--------|
| Bosnia and Herzegovina | 2.509     | 0.084  | 0.001  |
| Bulgaria               | 2.666     | 0.106  | 0.001  |
| Croatia                | 2.352     | 0.087  | 0.001  |
| Czech Republic         | 2.567     | 0.066  | 0.001  |
| Finland                | 2.557     | 0.013  | 0.001  |
| France                 | 2.003     | 0.101  | 0.001  |
| Germany                | 2.918     | 0.009  | 0.001  |
| Japan                  | 1.822     | 0.058  | 0.001  |
| Mexico                 | 2.632     | -0.012 | 0.001  |
| Poland                 | 2.133     | 0.069  | 0.001  |
| Sweden                 | 2.322     | 0.078  | 0.001  |
| Switzerland            | 2.571     | 0.029  | 0.001  |
| Turkey                 | 1.733     | 0.061  | 0.001  |
| United Kingdom         | 2.062     | 0.039  | 0.001  |
| United States          | 1.907     | 0.143  | 0.001  |

*Note.* The random coefficients were calculated by summing the fixed effects and their respective random effects. A constant fixed effect is shown across countries when random effects were not significant.

**Table E15**

*Estimated random intercepts, PSM-TM and PSM-TH coefficients for different countries when predicting aligned conscientiousness scores (unstandardized)*

| Country                | Intercept | PSM-TM | PSM-TH |
|------------------------|-----------|--------|--------|
| Bosnia and Herzegovina | 2.293     | 0.003  | 0.067  |
| Bulgaria               | 1.893     | 0.072  | 0.067  |
| Croatia                | 2.227     | 0.034  | 0.067  |
| Czech Republic         | 1.108     | 0.147  | 0.067  |
| Finland                | 2.168     | 0.080  | 0.067  |
| France                 | 1.901     | -0.028 | 0.067  |
| Germany                | 2.203     | -0.007 | 0.067  |
| Japan                  | 2.421     | -0.004 | 0.067  |
| Mexico                 | 2.456     | 0.037  | 0.067  |
| Poland                 | 2.331     | -0.007 | 0.067  |
| Sweden                 | 1.983     | 0.076  | 0.067  |
| Switzerland            | 2.231     | -0.051 | 0.067  |
| Turkey                 | 2.963     | -0.085 | 0.067  |
| United Kingdom         | 2.265     | -0.011 | 0.067  |
| United States          | 2.178     | -0.037 | 0.067  |

*Note.* The random coefficients were calculated by summing the fixed effects and their respective random effects. A constant fixed effect is shown across countries when random effects were not significant.

**Table E16**

*Estimated random intercepts, PSM-TM and PSM-TH coefficients for different countries when predicting aligned agreeableness scores (unstandardized)*

| Country                | Intercept | PSM-TM | PSM-TH |
|------------------------|-----------|--------|--------|
| Bosnia and Herzegovina | 2.823     | -0.046 | -0.013 |
| Bulgaria               | 2.715     | -0.046 | -0.013 |
| Croatia                | 2.515     | -0.046 | -0.013 |
| Czech Republic         | 2.658     | -0.046 | -0.013 |
| Finland                | 2.832     | -0.046 | -0.013 |
| France                 | 3.528     | -0.046 | -0.013 |
| Germany                | 2.835     | -0.046 | -0.013 |
| Japan                  | 3.228     | -0.046 | -0.013 |
| Mexico                 | 3.112     | -0.046 | -0.013 |
| Poland                 | 2.624     | -0.046 | -0.013 |
| Sweden                 | 3.257     | -0.046 | -0.013 |
| Switzerland            | 3.103     | -0.046 | -0.013 |
| Turkey                 | 2.681     | -0.046 | -0.013 |
| United Kingdom         | 3.009     | -0.046 | -0.013 |
| United States          | 3.124     | -0.046 | -0.013 |

*Note.* The random coefficients were calculated by summing the fixed effects and their respective random effects. A constant fixed effect is shown across countries when random effects were not significant.

## References

- Asparouhov, T., & Muthén, B. (2014). Multiple-Group Factor Analysis Alignment. *Structural Equation Modeling: A Multidisciplinary Journal*, 21(4), 495–508.  
<https://doi.org/10.1080/10705511.2014.919210>
- Bates, D., Kliegl, R., Vasishth, S., & Baayen, H. (2018). Parsimonious Mixed Models. *ArXiv:1506.04967 [Stat]*. <http://arxiv.org/abs/1506.04967>
- Bates, D., Mächler, M., Bolker, B., & Walker, S. (2015). Fitting Linear Mixed-Effects Models Using **lme4**. *Journal of Statistical Software*, 67(1). <https://doi.org/10.18637/jss.v067.i01>
- Byrne, B. M., & van de Vijver, F. J. R. (2017). The maximum likelihood alignment approach to testing for approximate measurement invariance: A paradigmatic cross-cultural application. *Psicothema*, 29(4), 539–551. <https://doi.org/10.7334/psicothema2017.178>
- Firke, S. (2021). *janitor: Simple tools for examining and cleaning dirty data* (R package version 2.1.0). <https://CRAN.R-project.org/package=janitor>
- Fischer, R., & Karl, J. A. (2019). A Primer to (Cross-Cultural) Multi-Group Invariance Testing Possibilities in R. *Frontiers in Psychology*, 10, 1507.  
<https://doi.org/10.3389/fpsyg.2019.01507>
- Han, H. (2021). Exploring the association between compliance with measures to prevent the spread of COVID-19 and big five traits with Bayesian generalized linear model. *Personality and Individual Differences*, 176, 110787. <https://doi.org/10.1016/j.paid.2021.110787>
- Jorgensen, T. D., Pornprasertmanit, S., Schoemann, A. M., & Rosseel, Y. (2021). *semTools: Useful tools for structural equation modeling* (R package version 0.5-5.912). <https://CRAN.R-project.org/package=semTools>
- Kuznetsova, A., Brockhoff, P. B., & Christensen, R. H. B. (2017). **lmerTest** Package: Tests in Linear Mixed Effects Models. *Journal of Statistical Software*, 82(13).  
<https://doi.org/10.18637/jss.v082.i13>

- Lenth, R. V. (2021). *emmeans: Estimated Marginal Means, aka Least-Squares Means* (R package version 1.7.0). <https://CRAN.R-project.org/package=emmeans>
- Muthén, B., & Asparouhov, T. (2014). IRT studies of many groups: The alignment method. *Frontiers in Psychology, 5*, 978. <https://doi.org/10.3389/fpsyg.2014.00978>
- R Core Team. (2021). *R: A Language and Environment for Statistical Computing*. R Foundation for Statistical Computing. <https://www.R-project.org/>
- Revelle, W. (2022). *psych: Procedures for psychological, psychometric, and personality research* (R package version 2.2.9). Northwestern University. <https://CRAN.R-project.org/package=psych>
- Robitzsch, A. (2021). *sirt: Supplementary item response theory models* (R package version 3.10-118). <https://CRAN.R-project.org/package=sirt>
- Rosseel, Y. (2012). lavaan: An R package for structural equation modeling. *Journal of Statistical Software, 48*(2), 1–36.
- Rutkowski, L., & Svetina, D. (2014). Assessing the Hypothesis of Measurement Invariance in the Context of Large-Scale International Surveys. *Educational and Psychological Measurement, 74*(1), 31–57. <https://doi.org/10.1177/0013164413498257>
- Rutkowski, L., & Svetina, D. (2017). Measurement Invariance in International Surveys: Categorical Indicators and Fit Measure Performance. *Applied Measurement in Education, 30*(1), 39–51. <https://doi.org/10.1080/08957347.2016.1243540>
- Wickham, H., Averick, M., Bryan, J., Chang, W., McGowan, L. D., François, R., Grolemund, G., Hayes, A., Henry, L., Hester, J., Kuhn, M., Pedersen, T. L., Miller, E., Bache, S. M., Müller, K., Ooms, J., Robinson, D., Seidel, D. P., Spinu, V., ... Yutani, H. (2019). Welcome to the tidyverse. *Journal of Open Source Software, 4*(43), 1686. <https://doi.org/10.21105/joss.01686>
